## RESEARCH ARTICLE

# *Drosophila* Vps4 promotes Epidermal growth factor receptor signaling independently of its role in receptor degradation

Kevin Legent\*, Hui Hua Liu and Jessica E. Treisman<sup>†</sup>**ABSTRACT**

Endocytic trafficking of signaling receptors is an important mechanism for limiting signal duration. Components of the Endosomal Sorting Complexes Required for Transport (ESCRT), which target ubiquitylated receptors to intra-lumenal vesicles (ILVs) of multivesicular bodies, are thought to terminate signaling by the epidermal growth factor receptor (EGFR) and direct it for lysosomal degradation. In a genetic screen for mutations that affect *Drosophila* eye development, we identified an allele of *Vacuolar protein sorting 4* (*Vps4*), which encodes an AAA ATPase that interacts with the ESCRT-III complex to drive the final step of ILV formation. Photoreceptors are largely absent from *Vps4* mutant clones in the eye disc, and even when cell death is genetically prevented, the mutant R8 photoreceptors that develop fail to recruit surrounding cells to differentiate as R1–R7 photoreceptors. This recruitment requires EGFR signaling, suggesting that loss of *Vps4* disrupts the EGFR pathway. In imaginal disc cells mutant for *Vps4*, EGFR and other receptors accumulate in endosomes and EGFR target genes are not expressed; epistasis experiments place the function of *Vps4* at the level of the receptor. Surprisingly, *Vps4* is required for EGFR signaling even in the absence of Shbire, the Dynamin that internalizes EGFR from the plasma membrane. In ovarian follicle cells, in contrast, *Vps4* does not affect EGFR signaling, although it is still essential for receptor degradation. Taken together, these findings indicate that *Vps4* can promote EGFR activity through an endocytosis-independent mechanism.

**KEY WORDS:** Vps4, Endocytosis, EGF receptor, Dynamin, Signaling**INTRODUCTION**

Endocytosis plays a dual role in signaling by many receptors; it is the route that leads to receptor degradation, but it can also alter the level of signaling activity by controlling receptor or ligand processing, recycling, localization or interaction with downstream components (Andersson, 2012; Callejo et al., 2011; Musse et al., 2012; Shilo and Schejter, 2011; Ueno et al., 2011). Activation of many receptors induces their ubiquitylation, internalization into early endosomes, sorting to multivesicular bodies (MVBs), where they are segregated from the cytoplasm, and ultimately lysosomal degradation (Piper and Lehner, 2011). The GTPase Dynamin catalyzes fission of Clathrin-coated endocytic vesicles from the plasma membrane (Schmid and Frolov, 2011). The subsequent sorting process is mediated by the Endosomal Sorting Complexes Required for Transport (ESCRT)

machinery (Hanson and Cashikar, 2012). ESCRT-0, which consists of the Hepatocyte growth factor regulated tyrosine kinase substrate (Hrs) and Signal transduction adaptor molecule (Stam) subunits, binds to and clusters ubiquitylated receptors. ESCRT-0 is recruited to endosomal membranes through interactions between Hrs and phosphatidylinositol 3-phosphate. It then recruits the four-subunit ESCRT-I complex, which brings in ESCRT-II, the substrate for assembly of ESCRT-III. The ESCRT-III subunit Vacuolar protein-sorting-associated protein 32 (*Vps32*) polymerizes into filaments that interact with *Vps24* and *Vps2* to deform the endosome membrane and promote budding of cargo-containing intra-lumenal vesicles (ILVs) (Henne et al., 2012; Wollert and Hurley, 2010). *Vps2* also recruits the ATPase associated with a variety of cellular activities (AAA) protein *Vps4*, the only energy-utilizing ESCRT component (Hanson and Cashikar, 2012; Raiborg and Stenmark, 2009). Active *Vps4* forms a hexameric complex that disassembles ESCRT-III, allowing recycling of its components, and also plays an active role in scission of the vesicle neck (Adell et al., 2014; Cashikar et al., 2014; Lata et al., 2008; Monroe et al., 2014; Mueller et al., 2012). In addition to their endocytic functions, ESCRT proteins, including *Vps4*, are required for cytokinesis, viral budding, protecting viral genomes from degradation, exosome secretion, receptor shedding on microvesicles, assembly of nuclear pore complexes, cholesterol transport and plasma membrane wound repair (Barajas et al., 2014; Choudhuri et al., 2014; Du et al., 2013; de Gassart et al., 2004; Jimenez et al., 2014; Morita, 2012; Nabhan et al., 2012; Tang, 2012; Webster et al., 2014).

The effect of endocytosis on signaling by the epidermal growth factor receptor (EGFR) is complex. Blocking EGFR internalization by removing Dynamin prevents its degradation, enhancing some downstream signaling events, but other aspects of EGFR signal transduction require an endosomal localization for the receptor (Jones and Rappoport, 2014; Legent et al., 2012; Miura et al., 2008; Teis et al., 2006; Vieira et al., 1996). Internalized EGFR can be either degraded or recycled to the plasma membrane, a choice that depends on the concentration and nature of the ligand, as ligands that remain bound in acidic late endosomes promote more extensive receptor ubiquitylation (Eden et al., 2012; French et al., 1995; Roepstorff et al., 2009; Sigismund et al., 2005). Recycling can alter the distribution of the receptor on the plasma membrane, controlling its exposure to ligands (Assaker et al., 2010; Jékely et al., 2005; Stetak et al., 2006; Vermeer et al., 2003). In *Drosophila*, EGFR targeted to the degradation pathway remains active on endosomes, as signaling is increased by ESCRT mutations that trap EGFR in the endocytic pathway (Vaccari et al., 2009). However, the transcriptional response in cultured mammalian cells depends primarily on EGFR activity at the plasma membrane (Brankatschk et al., 2012; Sousa et al., 2012). Observed effects on EGFR signaling could vary depending both on the stage at which endocytic sorting is blocked and the cellular context examined (Babst et al., 2000; Bache et al., 2006; Chanut-Delalande et al., 2010; Lloyd et al., 2002; Miura et al., 2008).

Kimmel Center for Biology and Medicine of the Skirball Institute and Department of Cell Biology, NYU School of Medicine, 540 First Avenue, New York, NY 10016, USA.  
<sup>\*</sup>Present address: Institut Jacques Monod, UMR7592 CNRS/Université Paris Diderot, 15 rue Hélène Brion, Paris 75205, Cedex 13, France.

<sup>†</sup>Author for correspondence (jessica.treisman@med.nyu.edu)

Received 17 September 2014; Accepted 20 February 2015

In the *Drosophila* retina, EGFR signaling is essential for the differentiation of all photoreceptors except for R8, the first to differentiate in each ommatidium (Freeman, 1996). Adult eye phenotypes thus provide a rapid screen for new regulators of the EGFR pathway (Legent et al., 2012; Miura et al., 2008; Roignant et al., 2006; Roignant and Treisman, 2010). Here, we report that a mutation in *Vps4* disrupts EGFR signal transduction as well as the transduction of other signaling pathways. In *Vps4* mutant cells in the eye disc, EGFR accumulates in endosomes but is unable to signal, resulting in the failure of non-R8 photoreceptors to differentiate. Interestingly, removing the Dynamin encoded by *shibire* does not restore EGFR signaling in the absence of *Vps4*, suggesting a new role for *Vps4* upstream of EGFR internalization. *Vps4* mutant ovarian follicle cells accumulate endocytosed EGFR, but show normal expression of EGFR target genes, indicating that defects in EGFR signaling in imaginal discs are not a consequence of its sequestration in the endocytic pathway. Taken together, these results suggest that *Vps4* promotes EGFR activation independently of its effects on endocytosis.

## RESULTS

### *Vps4* is required for R8 survival and R1-R7 differentiation

In a mosaic screen of the X chromosome (Legent et al., 2012), we recovered a mutation that prevents photoreceptor differentiation. In eye imaginal discs, clones of *3B1* mutant cells showed a cell-autonomous lack of expression of the pan-neuronal marker Elav (Fig. 1A), normally expressed by differentiating photoreceptors (Robinow and White, 1991). Genetic mapping and sequencing revealed that *3B1* was a missense mutation in the *Vps4* gene. *3B1* transforms glutamate 209, which is adjacent to the first central pore motif of the AAA domain (Scott et al., 2005), into a lysine residue (Fig. 1B), a charge reversal that would probably disrupt protein folding. *3B1* failed to complement the lethality of *Vps4<sup>Δ7b</sup>*, a small deficiency that covers *Vps4* and its flanking sequences (Rodahl et al., 2009a). Expression of an HA-tagged wild-type *Vps4* cDNA in *3B1* clones fully rescued photoreceptor differentiation (Fig. 1C-E). Additionally, 98% ( $n=106$ ) of hemizygous *3B1* males were rescued to viability by *tubulin-GAL4*-driven ubiquitous expression of *UAS-HA::Vps4*. These results confirm that the phenotypes observed in *3B1* mutants are due to loss of *Vps4* function.

The absence of photoreceptors in *Vps4* mutant clones could be due to either failure of differentiation or cell death. We observed that *Vps4<sup>3B1</sup>* mutant clones in third-instar eye discs underwent massive apoptosis, as indicated by their pyknotic nuclei and high levels of activated effector caspases (Fig. 2A). Both features were largely rescued in the absence of the initiator caspase *Dronc* (Steller, 2008) (Fig. 2B). Signaling pathways converging on c-Jun N-terminal Kinase (JNK) have been implicated in the regulation of programmed cell death in various contexts (Dhanasekaran and Reddy, 2008). As previously reported for *Vps4* RNAi expression (Rodahl et al., 2009a), we found that *Vps4<sup>3B1</sup>* clones misexpressed the JNK transcriptional target *puckered* (*puc*)-*lacZ* (Martin-Blanco et al., 1998) (supplementary material Fig. S1A). To assess whether ectopic JNK signaling is instructive in photoreceptor cell death, we created clones mutant for both *Vps4* and *hemipterous* (*hep*), which encodes the upstream activating kinase for JNK (Glise et al., 1995). However, removing *hep* did not restore photoreceptor differentiation or prevent caspase activation (supplementary material Fig. S1B-F). Similarly, inhibiting JNK signaling by overexpressing the JNK phosphatase *Puc* failed to rescue the *Vps4* phenotypes (supplementary material Fig. S1G,H). JNK activity is thus not the primary driver of apoptosis in *Vps4* mutant cells in the eye disc.

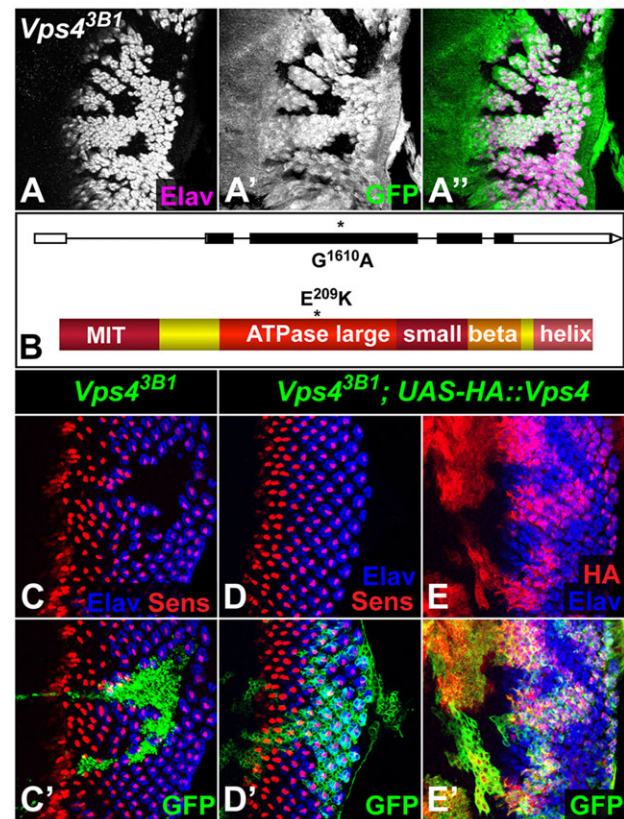

**Fig. 1. *Vps4* is required for photoreceptor differentiation.** (A) *Vps4<sup>3B1</sup>* mutant clones in third-instar eye discs, marked by the absence of GFP (A', green in A''), lack photoreceptors stained with anti-Elav (A, magenta in A''). Anterior is to the left in this and all subsequent figures. (B) Diagram of the *Vps4* gene and encoded protein indicating that the *3B1* mutation changes glutamic acid 209 in the large AAA ATPase domain into a lysine residue. MIT, microtubule interacting and trafficking domain. The ATPase domain is subdivided into large, small and beta domains. (C-E) Eye discs expressing GFP (green) or together with HA-tagged wild-type *Vps4* (D,E), within *Vps4<sup>3B1</sup>* mutant clones. HA::Vps4 (stained for HA, red in E) rescues the differentiation of photoreceptors labeled with Elav (blue) including R8, which is marked by Sens (red in C,D).

The rescue of cell death observed in the absence of *Dronc* allowed us to examine early markers of photoreceptor differentiation in *Vps4* mutant cells. In each ommatidium, R8, marked by expression of Senseless (Sens) (Frankfort et al., 2001), is the first photoreceptor to differentiate. R8 cells are singled out of an anterior stripe of proneural precursors expressing Atonal (Ato) (Jarman et al., 1993). Only a few Sens-positive R8 cells were observed in anterior regions of *Vps4<sup>3B1</sup>* mutant clones (Fig. 2C). However, preventing cell death by removing *Dronc* rescued many R8 photoreceptors (Fig. 2D), indicating that *Vps4* is required for R8 survival. R8 induces EGFR activation in surrounding cells to promote their differentiation into R1-R7 photoreceptors (Freeman, 1997; Tio et al., 1994). In *Vps4* clones, most rescued R8 cells failed to recruit any Elav-positive neighboring cells (Fig. 2E,F). The absence of R1-R7 photoreceptors is thus not a secondary consequence of cell death, but results from a failure to transduce signals from R8.

### *Vps4* mutant cells accumulate inactive signaling receptors

Mutations in *Tumor susceptibility gene 101* (*TSG101*) of the ESCRT-I complex and *Vps25* of the ESCRT-II complex cause accumulation of the receptor Notch (N), which drives excessive

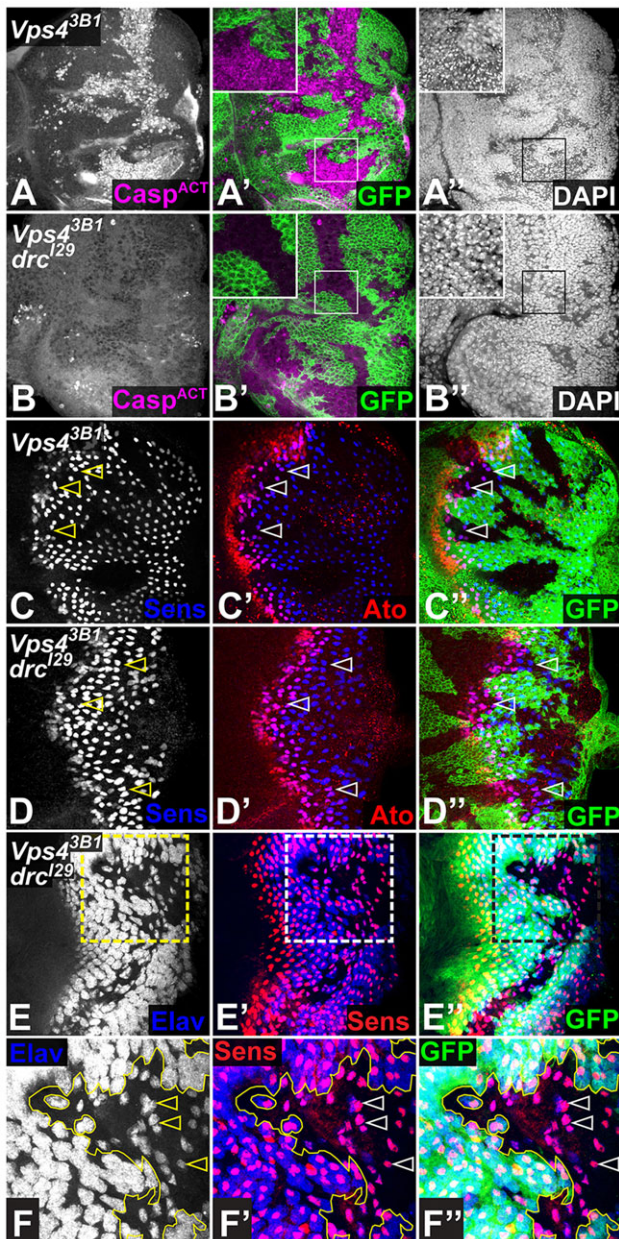

**Fig. 2. *Vps4* is independently required for cell survival and R1-R7 differentiation.** (A-F) Eye discs carrying *Vps4*<sup>3B1</sup> mutant clones marked by the absence of GFP (green), in a wild-type (A,C) or *Dronc*<sup>129</sup> (*drc*<sup>129</sup>) (B,D-F) background. *Vps4*<sup>3B1</sup> clones display elevated levels of activated Caspase 3 (A, magenta in A') and pyknotic nuclei stained with DAPI (A''), which are greatly reduced in *Dronc*<sup>129</sup> homozygotes (B). Very few Sens-positive R8 cells (C, blue in C',C'') differentiate in *Vps4*<sup>3B1</sup> clones (arrowheads). Expression of Ato (red) in anterior proneural precursors is decreased but not abolished. (D) A substantial rescue of differentiated R8 photoreceptors stained with Sens (blue) and Ato (red) is observed in *Dronc*<sup>129</sup> homozygotes (arrowheads). (E,F) *Vps4*<sup>3B1</sup> clones in *Dronc*<sup>129</sup> discs stained for Elav (E, blue in E',E'') and Sens (red). (F) An enlargement of the region boxed in E. Within the *Vps4*<sup>3B1</sup> clone (outlined), R8 cells are not surrounded by Elav-positive photoreceptors (arrowheads).

signaling, leading to nonautonomous overproliferation (Moberg et al., 2005; Vaccari and Bilder, 2005). Similarly, we found that *Vps4* mutant cells accumulated very high levels of both N and its ligand Delta (DI) in punctate structures (Fig. 3A,B). However, unlike the upstream ESCRT mutants *TSG101* and *Vps25*, N

signaling was reduced in *Vps4* mutant cells, as visualized by lower levels of the transcriptional reporter *E(spl)mβ-CD2* (de Celis et al., 1998; Moberg et al., 2005) in the eye disc (Fig. 3C). We also investigated the requirement for *Vps4* in N signaling during wing development. As *Vps4* clones in the wing disc survived poorly (supplementary material Fig. S2), we induced them in a *Dronc* background, and again observed accumulation of N in large puncta (Fig. 3D). In the wing disc, N is activated in a stripe of cells along the dorsal-ventral (D-V) boundary, where it induces the transcription of *cut* (*ct*) (de Celis et al., 1996). Ct expression was lost in *Vps4* clones (Fig. 3E), confirming that, in contrast to more-upstream ESCRT mutants, *Vps4* promotes N signal transduction.

We next investigated whether other signaling pathways were similarly affected. In the wing disc, Wingless (Wg) secreted from both the D-V boundary and the hinge surrounding the wing pouch acts at a long range to organize wing growth and patterning (Neumann and Cohen, 1997). Like N and DI, Wg accumulated in large punctate structures in *Vps4* mutant cells (Fig. 3F). In both the wing and eye discs, Wg only accumulated in mutant cells within or close to its endogenous domain of expression, which is marked by the reporter *wg-lacZ* (Fig. 3H-I). *wg-lacZ* was unaffected by the loss of *Vps4* (Fig. 3H), indicating that Wg protein accumulation results from internalization into receiving cells rather than increased transcription. *Vps4* clones showed reduced expression of the Wg target genes *sens* in the wing disc (Fig. 3G) (Parker et al., 2002) and *dachsous-lacZ* in the eye disc (Yang et al., 2002) (data not shown), demonstrating that normal Wg signaling requires *Vps4*.

In contrast to the reduction in N and Wg signaling, we observed increased levels of the second messenger phosphorylated Smad (pSmad) (Tanimoto et al., 2000) in *Vps4* mutant clones near the domain of expression of the Bone Morphogenetic Protein family member Decapentaplegic (Dpp) in the eye disc (Fig. 3J), suggesting that *Vps4* mutant cells are able to transduce some signals and that, in contrast to its effects on other pathways, *Vps4* negatively regulates signaling by Dpp. Taken together, our results indicate that unlike more-upstream ESCRT members, *Vps4* is required for the transduction of several signaling pathways.

### ***Vps4* is required for EGFR signaling**

The effect of receptor internalization and endocytic processing on EGFR signaling remains controversial. Although some studies have demonstrated that it contributes to signal termination through lysosomal EGFR degradation (Bache et al., 2006; Razi and Futter, 2006), other results argue that it enables receptor signaling from intracellular organelles (Miaczynska et al., 2004; Shilo and Schejter, 2011). *Vps4* clones in *Dronc* mutant eye discs resemble clones lacking positive intracellular effectors of EGFR transduction, in which R8 cells fail to recruit additional photoreceptors (Legent et al., 2012). We found that the expression of *lacZ* reporters for two direct transcriptional targets of the EGFR pathway in R1-R7, *argos* (*aos*) (Golembo et al., 1996) and *hedgehog* (*hh*) (Rogers et al., 2005), was downregulated in *Vps4* mutant clones (Fig. 4A,B). Importantly, restoring R8 survival by removing *Dronc* did not rescue *aos* expression in surrounding cells (Fig. 4C). In the wing disc, EGFR signaling controls both the expression of *aos* in vein primordia (Sturtevant et al., 1993), and the expression of *mirror* (*mirr*) in the notum primordium (Zecca and Struhl, 2002). Consistent with a requirement for *Vps4* in EGFR signaling, *Vps4* mutant cells displayed a reduced expression of *aos-lacZ* and *mirr-lacZ* (Fig. 4E,F).

Despite the lack of EGFR target gene expression, EGFR protein levels were increased in *Vps4* mutant cells (Fig. 4D,G,H).

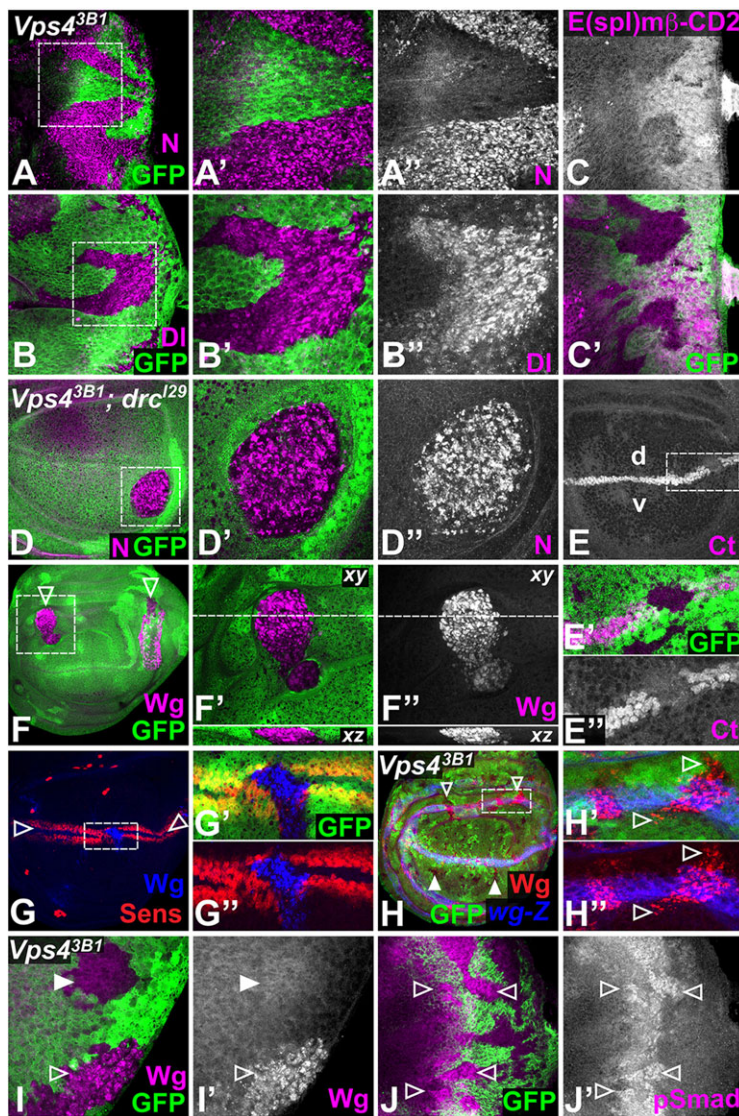

**Fig. 3. Loss of *Vps4* affects multiple signaling pathways.** *Vps4*<sup>3B1</sup> clones marked by the absence of GFP (green) in eye discs (A-C, I-J) or in *Dronc*<sup>129</sup> (*drc*<sup>129</sup>) homozygous wing discs (D-H). (A, B) Mutant cells accumulate high levels of N (A', magenta in A, A') and DI (B', magenta in B, B') in large puncta (boxed regions are enlarged in A', A'', B', B''). (C) Expression of the Notch transcriptional reporter *E(spl)-mβ-CD2* (C, magenta in C') is decreased in *Vps4* clones. (D) Mutant cells accumulate large N-positive puncta (D', magenta in D, D'), the boxed region is enlarged in D', D''). (E) The Notch transcriptional target Ct (E, E', magenta in E'), normally expressed at the boundary between the dorsal (d) and ventral (v) compartments of the wing pouch, is lost in *Vps4* clones (the boxed region is enlarged in E', E''). (F) Wg (F', magenta in F, F') also accumulates in large puncta that span the depth of the cell in *Vps4* clones (arrowheads; the boxed region is enlarged in F', F''); xz sections are shown below). (G) The Wg target Sens (red) is expressed in two stripes (arrowheads) along the D-V boundary of the wing pouch, but is lost from *Vps4* clones, despite accumulation of Wg (blue). The boxed region is enlarged in G', G''). (H) Ectopic Wg (red) is observed in *Vps4* clones in the vicinity of Wg-producing cells (open arrowheads), marked by *wg-lacZ* (blue), but not in more distant clones (filled arrowheads). The boxed region is enlarged in H', H''). (I) In eye discs, Wg puncta (I', magenta in I) are observed in clones along the lateral margins (open arrowhead) but not in more medial clones (filled arrowhead). (J) *Vps4* clones display elevated levels of pSmad (J', magenta in J) in the region of the morphogenetic furrow (arrowheads).

Intracellular EGFR colocalized with N in punctate structures, many of which also expressed the early endosomal markers Hrs, Rab5 and Syntaxin 7 (Syx7) (Lloyd et al., 2002; Lu and Bilder, 2005; Russell et al., 2012) (Fig. 4D, G, H; supplementary material Fig. S3A). Little colocalization was observed with markers for recycling endosomes (Rab11), the Golgi (Lava lamp; *Lva*) or secretory vesicles (*Sec15*) (Langevin et al., 2005; Sisson et al., 2000) (supplementary material Fig. S3B-D), arguing that the EGFR accumulation is in enlarged endosomes, known as class E compartments in yeast (Russell et al., 2012). Consistent with this view, loss of the ESCRT-I subunit TSG101 caused a similar accumulation of EGFR in punctate structures expressing Hrs (supplementary material Fig. S3F).

S2 cells stably expressing the EGFR (D2F cells) have been used to study EGFR signaling mechanisms (Schweitzer et al., 1995). Treatment of these cells with a purified secreted form of the EGFR ligand Spitz (Spi) (Miura et al., 2006) resulted in increased production and secretion of Aos protein (Fig. 4I). However, RNAi-mediated knockdown of *Vps4* (supplementary material Fig. S4A) strongly reduced this response (Fig. 4I). *Vps4* RNAi also reduced the phosphorylation of the downstream effector MAPK (also known as ERK and Rolled) in cells treated with Spi (supplementary material Fig. S4B). These results indicate that the effect of *Vps4* on

EGFR signaling is not dependent on the fate or epithelial organization of imaginal disc cells.

### ***Vps4* acts at the level of EGFR activation**

In order to determine at which step *Vps4* influences EGFR signal transduction, we performed epistasis experiments. In the eye disc, Spi secreted by R8 is the primary ligand for EGFR in R1-R7 (Freeman, 1994; Tio et al., 1994). Its binding triggers receptor dimerization and activation by autophosphorylation, and subsequent recruitment of enzymes and adaptor proteins promotes conversion of Ras (also known as Ras85D) into its GTP-bound form. This small GTPase initiates a kinase cascade by activating Raf (also known as Pole hole), which phosphorylates MEK (also known as Dsor1), which in turn phosphorylates MAPK. Phosphorylated MAPK enters the nucleus and phosphorylates specific transcription factors to regulate target gene expression (Shilo, 2003). During eye development, expression of a secreted form of Spi (sSpi) (Schweitzer et al., 1995) or constitutively active forms of EGFR (Queenan et al., 1997) or Ras (Karim and Rubin, 1998) ectopically activates EGFR signaling and promotes the differentiation of extra photoreceptors (Fig. 5A-C). Expression of sSpi did not rescue photoreceptor differentiation in *Vps4* mutant cells, although it triggered ectopic photoreceptor

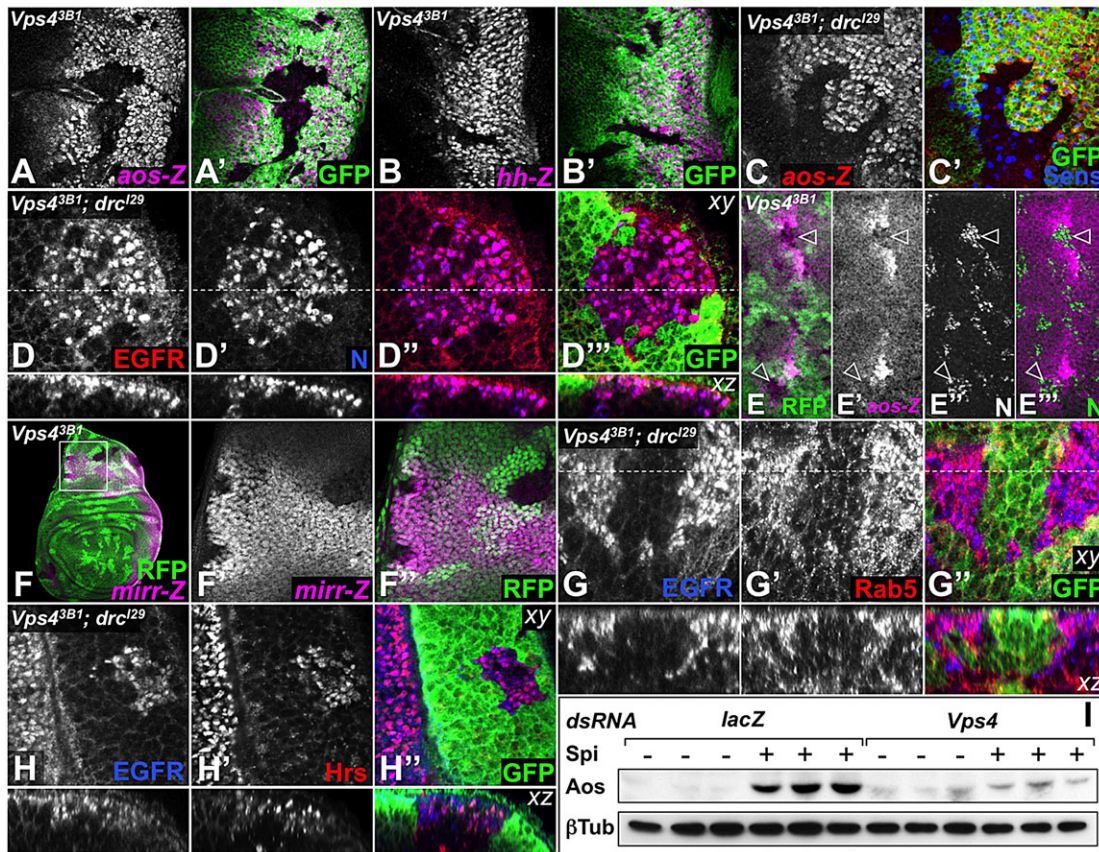

**Fig. 4. *Vps4* is required for EGFR signaling.** Eye discs (A-D, G-H) or wing discs (E, F) in which *Vps4<sup>3B1</sup>* mutant clones are marked by the absence of GFP (green, A-D, G-H) or RFP (green, E, F), in a wild-type (A-B, E-F) or *Dronc<sup>129</sup>* (*drc<sup>129</sup>*) homozygous (C-D, G-H) background. *Vps4<sup>3B1</sup>* clones lose expression of the EGFR transcriptional targets *aos-lacZ* (A, magenta in A') and *hh-lacZ* (B, magenta in B'). (C) R8 cells marked by Sens (blue) in *Vps4* clones in *Dronc* homozygotes fail to induce *aos-lacZ* (C, red in C') in surrounding cells. (D) EGFR (D, red in D'', D''') and N (D', blue in D'', D''') accumulate and colocalize in punctate structures in *Vps4* mutant cells (xz sections are shown below). (E) *aos-lacZ* (E', magenta in E, E''') is normally expressed along presumptive veins but is lost in *Vps4<sup>3B1</sup>* clones (arrowheads), which accumulate high levels of N (E'', green in E'''). (F) In the notum, expression of the EGFR transcriptional target *mirr-lacZ* (F', magenta in F, F'') is decreased in *Vps4* mutant cells. The boxed region is enlarged in F', F''. (G, H) In *Vps4* mutant cells, punctate accumulations of EGFR (G, H, blue in G'', H'') colocalize extensively with Hrs (H', red in H'') and partially with Rab5 (G', red in G''). Both xy and xz sections are shown. (I) Western blots of Aos in the culture media and  $\beta$ -tubulin in the cell lysates of triplicate samples of D2F cells treated with *lacZ* or *Vps4* dsRNA as indicated, and exposed (+) or not exposed (-) to purified sSpi for 16 h. *Vps4* knockdown strongly reduces Aos production.

differentiation in wild-type cells surrounding the clone, indicating that *Vps4* is not necessary for Spi secretion (Fig. 5D). The same result was obtained by overexpressing Rhomboid, a protease that activates endogenous Spi (Lee et al., 2001) (data not shown). Interestingly, a constitutively dimeric form of EGFR showed partial activity in *Vps4* mutant cells; although photoreceptors still failed to differentiate within *Vps4* mutant clones expressing activated EGFR, surrounding cells showed premature differentiation (Fig. 5E), probably due to *hh* expression induced within the clone (supplementary material Fig. S5). Expression of activated Ras was sufficient to bypass the requirement for *Vps4* in EGFR transduction and promote the differentiation of extra photoreceptors both within and surrounding the clone (Fig. 5F). Similar epistasis experiments in the wing disc, using *aos-lacZ* to monitor pathway activation, showed that activated EGFR promoted strong ectopic *aos* expression in wild-type but not *Vps4* mutant cells, whereas activated Ras could upregulate *aos-lacZ* even in the absence of *Vps4* (supplementary material Fig. S6). The activity of *Vps4* is thus required in the receiving cell, upstream of Ras activation but downstream or at the level of EGFR activation (Fig. 5G).

Given that the EGFR pathway is required for cell survival in the eye disc (Halfar et al., 2001; Yang and Baker, 2003), we wondered whether restoring signaling downstream of the receptor could rescue

the cell death observed in *Vps4* mutant clones. Indeed, although activated EGFR did not prevent caspase activation in *Vps4* cells (Fig. 5H-J), activated Ras abolished apoptosis (Fig. 5K, L). These results demonstrate that, rather than ectopic JNK signaling (supplementary material Fig. S1) (Rodahl et al., 2009a), impaired EGFR signal transduction is the primary reason for the death of *Vps4* mutant cells.

#### ***Vps4* functions upstream of EGFR endocytosis**

Because the effect of *Vps4* on EGFR signaling was opposite to the negative effect of other ESCRT components (Vaccari et al., 2009) (see supplementary material Fig. S3E), we wanted to test whether *Vps4* acted during endocytosis to affect EGFR signaling. We therefore generated double mutant clones for *Vps4* and *shibire* (*shi*), which encodes Dynamin, a GTPase required to internalize EGFR and other receptors from the plasma membrane (Henriksen et al., 2013; Sousa et al., 2012; Windler and Bilder, 2010). *shi<sup>7C7</sup>* mutant cells have enhanced EGFR signaling, leading to increased photoreceptor differentiation (Legent et al., 2012) (Fig. 6A). The ESCRT-0 component Hrs has a positive role in EGFR signaling and photoreceptor differentiation in the eye disc (Miura et al., 2008). As expected, given that Dynamin acts prior to Hrs in endocytosis, *shi*

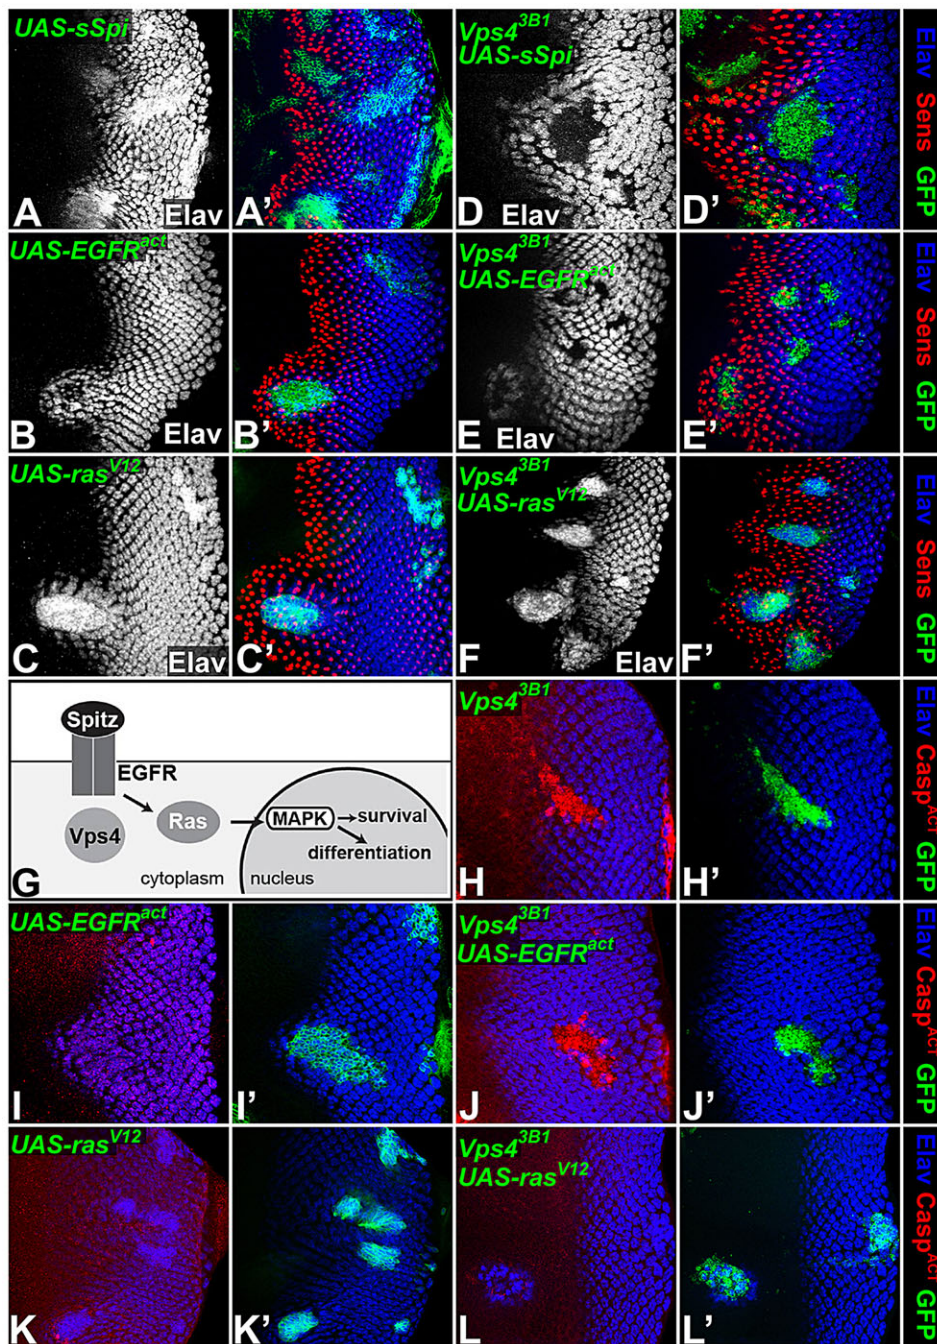

**Fig. 5. *Vps4* acts at the level of the EGFR.** (A-F,H-L) Eye discs with clones coexpressing GFP (green) with activated pathway components, stained for Elav (A-F and blue in A'-F',H-L). Sens is shown in red in A'-F'. Expression of the constitutively active proteins encoded by *sSpi* (A), *EGFR<sup>top</sup>* (B) or *Ras<sup>V12</sup>* (C) in wild-type clones induces excessive photoreceptor differentiation. In *Vps4<sup>3B1</sup>* clones, expression of *sSpi* (D) induces extra photoreceptor differentiation in wild-type cells surrounding the clone, but has no effect on the mutant cells. *EGFR<sup>top</sup>* expression in *Vps4* clones (E) does not rescue photoreceptor differentiation within the clones, but induces ectopic photoreceptors in surrounding wild-type tissue. In contrast, *Ras<sup>V12</sup>* can induce photoreceptor differentiation within *Vps4* mutant clones (F). (G) A simplified diagram of the EGFR pathway showing that *Vps4* acts upstream of Ras activation to promote photoreceptor differentiation and cell survival. (H-L) Activated Caspase 3 is stained in red. Control *EGFR<sup>top</sup>* (I) or *Ras<sup>V12</sup>* (K) expressing clones do not induce cell death. The caspase activation observed in *Vps4<sup>3B1</sup>* clones (H) is rescued by *UAS-Ras<sup>V12</sup>* (L) but not *UAS-EGFR<sup>top</sup>* (J).

mutant cells still showed increased photoreceptor differentiation in *Hrs* mutant eye discs, although loss of *Hrs* reduced photoreceptor differentiation in regions wild-type for *shi* (Miura et al., 2008) (Fig. 6B). Surprisingly, however, *shi<sup>7C7</sup> Vps4<sup>3B1</sup>* double mutants showed the *Vps4* phenotype of missing photoreceptors and loss of *aos-lacZ* expression, even in a *Dronc* background in which cell death was prevented (Fig. 6C,D). *Vps4* was similarly epistatic to *shi* in clones expressing a dominant-negative thermo-sensitive allele of *shi* (Kitamoto, 2001) (Fig. 6E,F). As the molecular nature of the *shi<sup>7C7</sup>* allele is unknown, we repeated the epistasis analysis with the previously described null allele *shi<sup>FL54</sup>* (Windler and Bilder, 2010). *shi<sup>FL54</sup> Vps4<sup>3B1</sup>* double mutant cells also failed to differentiate as photoreceptors, although removing *shi* prevented the endosomal accumulation of EGFR in these cells (Fig. 6G,H). These results are not consistent with an effect of *Vps4* only on internalized EGFR,

and suggest that *Vps4* can influence EGFR function prior to its endocytosis.

One possibility is that *Vps4* might promote EGFR trafficking to the plasma membrane. To investigate this, we made use of the ovarian model system, in which the ligand-producing and responding cells can be distinguished. During egg chamber development, the EGFR ligand Gurken (Grk) is secreted from the oocyte and internalized into first posterior and later dorsal anterior follicle cells to specify their fates (Chang et al., 2008; Nilson and Schüpbach, 1998). This internalization requires both *shi* and *Egfr* (Chang et al., 2008), indicating that it is mediated by binding to surface EGFR and subsequent endocytosis. We found that clones of follicle cells mutant for *Vps4* were still able to internalize Grk, and in fact accumulated abnormally high levels of Grk that colocalized with internalized EGFR in punctate structures (Fig. 7A). EGFR

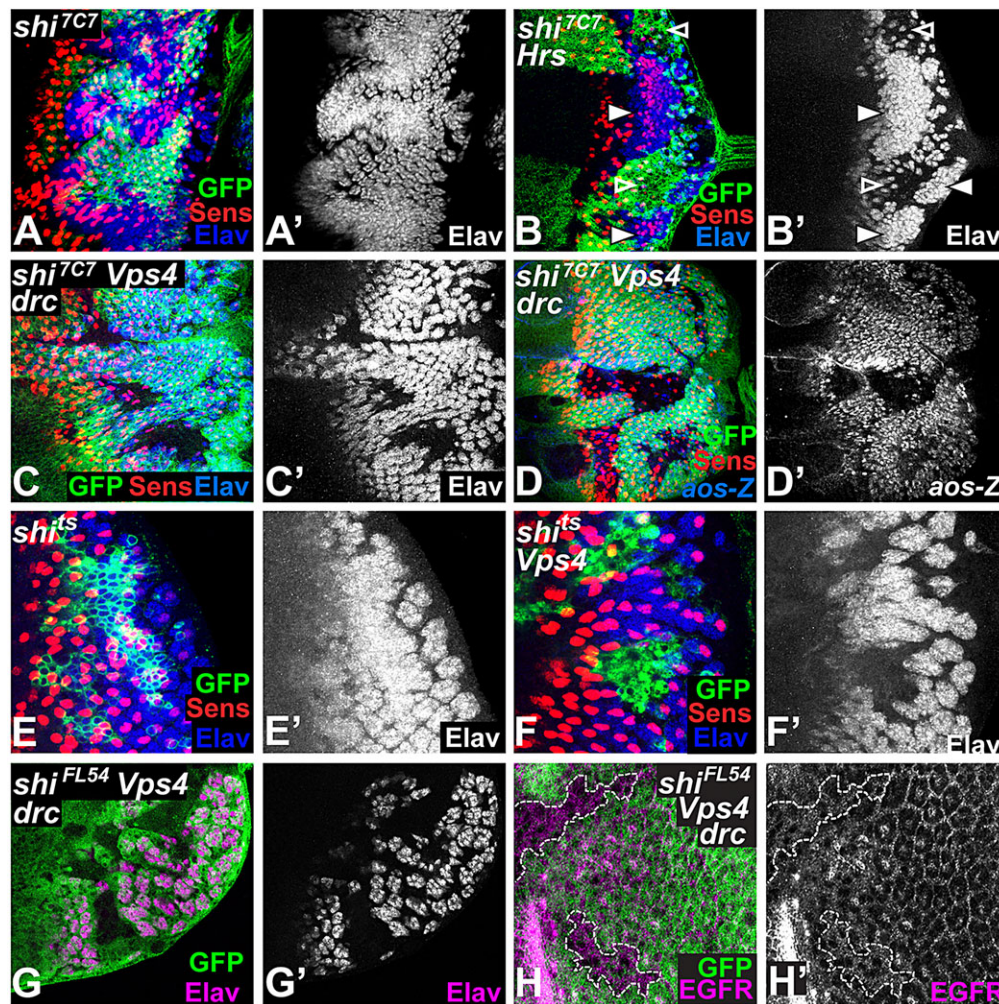

**Fig. 6. *Vps4* blocks EGFR signaling upstream of Dynamin-mediated internalization.** All panels show eye discs with clones marked by the absence of GFP (green) in A-D,G-H, or the presence of GFP (E,F). R8 is stained with Sens (red in A-F). Photoreceptors are stained with Elav (A'-C',E',F', blue in A-C,E,F) or *aos-lacZ* is stained with anti- $\beta$ -galactosidase (D', blue in D). (A) *shi*<sup>7C7</sup> clones differentiate excessive photoreceptors. (B) In an *Hrs*<sup>D28</sup>/*Df(Hrs)* mutant disc in which photoreceptor differentiation is reduced (open arrowheads), *shi*<sup>7C7</sup> clones still overproduce photoreceptors (filled arrowheads). (C,D) *shi*<sup>7C7</sup> *Vps4*<sup>3B1</sup> double mutant clones in a *Dronc*<sup>I29</sup> (*drc*<sup>I29</sup>) mutant background show loss of photoreceptors other than R8 and loss of *aos-lacZ* expression. (E,F) Clones expressing *shi*<sup>ts</sup> in otherwise wild-type cells (E) or in *Vps4*<sup>3B1</sup> mutant cells (F). *Vps4* is still required for photoreceptor differentiation in the presence of this dominant-negative form of Shi. (G,H) *shi*<sup>FL54</sup> *Vps4*<sup>3B1</sup> clones (outlined in H) in a *Dronc*<sup>I29</sup> mutant background are stained with Elav (G', magenta in G) or EGFR (H', magenta in H). Clones mutant for both *Vps4* and a *shi*-null allele lack photoreceptors but do not show punctate accumulation of EGFR.

must therefore be present on the surface of *Vps4* mutant follicle cells, allowing Grk reception. Surprisingly, *Vps4* was not required for EGFR signaling in these cells. In this system, EGFR signaling acts by preventing nuclear localization of the transcriptional repressor Capicua (Cic) (Astigarraga et al., 2007). Cic represses the expression of *mirr* (Atkey et al., 2006), which encodes a transcription factor that represses the ventral determinant *pipe* (Andreu et al., 2012). In dorsal follicle cells mutant for *Vps4*, a *mirr-lacZ* reporter was expressed normally, and no ectopic *pipe-lacZ* or nuclear localization of Cic was observed (Fig. 7B,C). The large clone size also indicated normal survival of these mutant cells. Notch signaling was likewise unaffected in *Vps4* mutant follicle cells. We saw no loss of its target gene *hindsight* (*hnt*; FlyBase – *peb*) or misexpression of *ct*, a gene repressed by Hnt (Sun and Deng, 2007), and mitotic cells marked by phosphorylated histone H3 were not observed in egg chambers older than stage 6 (Fig. 7D,E), despite strong intracellular accumulation of Notch protein (Fig. 7F). These results show that trapping of the EGFR with its ligand in the endocytic pathway is not sufficient to block EGFR signaling. *Vps4* thus appears to promote EGFR signaling by a new non-endocytic and cell type-dependent mechanism, which could also be applicable to Notch and other receptors.

## DISCUSSION

### *Vps4* affects multiple signaling pathways

We describe here a point mutation that specifically disrupts the function of *Drosophila Vps4*. A previous study used a deletion

allele that unlike our mutation, could not be rescued by a wild-type *Vps4* construct, and thus might also disrupt one or both of the neighboring genes (Rodahl et al., 2009a). We confirmed previous findings that loss of *Vps4* results in JNK activation and apoptosis (Rodahl et al., 2009a). However, we found that blocking JNK activity did not prevent cell death or restore photoreceptor differentiation, indicating that JNK is not the primary driver of these effects of *Vps4* mutations. In contrast, activating EGFR signaling downstream of the receptor was sufficient to restore survival of R8 cells and differentiation of R1-R7, highlighting this pathway as central to the function of *Vps4* in eye development.

As expected, given the known role for *Vps4* and other ESCRT proteins in targeting receptors for lysosomal degradation (Hanson and Cashikar, 2012), EGFR and other receptors accumulate in enlarged endosomes in *Vps4* mutant cells. However, this accumulation has distinct effects on their activity; loss of *Vps4* reduces EGFR, Notch and Wg signaling, but increases Dpp signaling. The effect on Wg target genes is consistent with previous findings that endocytosis and MVBs promote Wnt signaling by sequestering Glycogen synthase kinase 3 $\beta$ , which would otherwise inhibit  $\beta$ -catenin (Dobrowolski et al., 2012; Seto and Bellen, 2006; Taelman et al., 2010). Dpp signaling is also thought to require endocytosis, because Smads are recruited to activated TGF $\beta$  family receptors by the endosomal protein Smad anchor for receptor activation (Sara) (Bennett and Alpey, 2002; Panopoulou et al., 2002; Tsukazaki et al., 1998). As Sara is present on early endosomes, signaling can be prolonged when progression

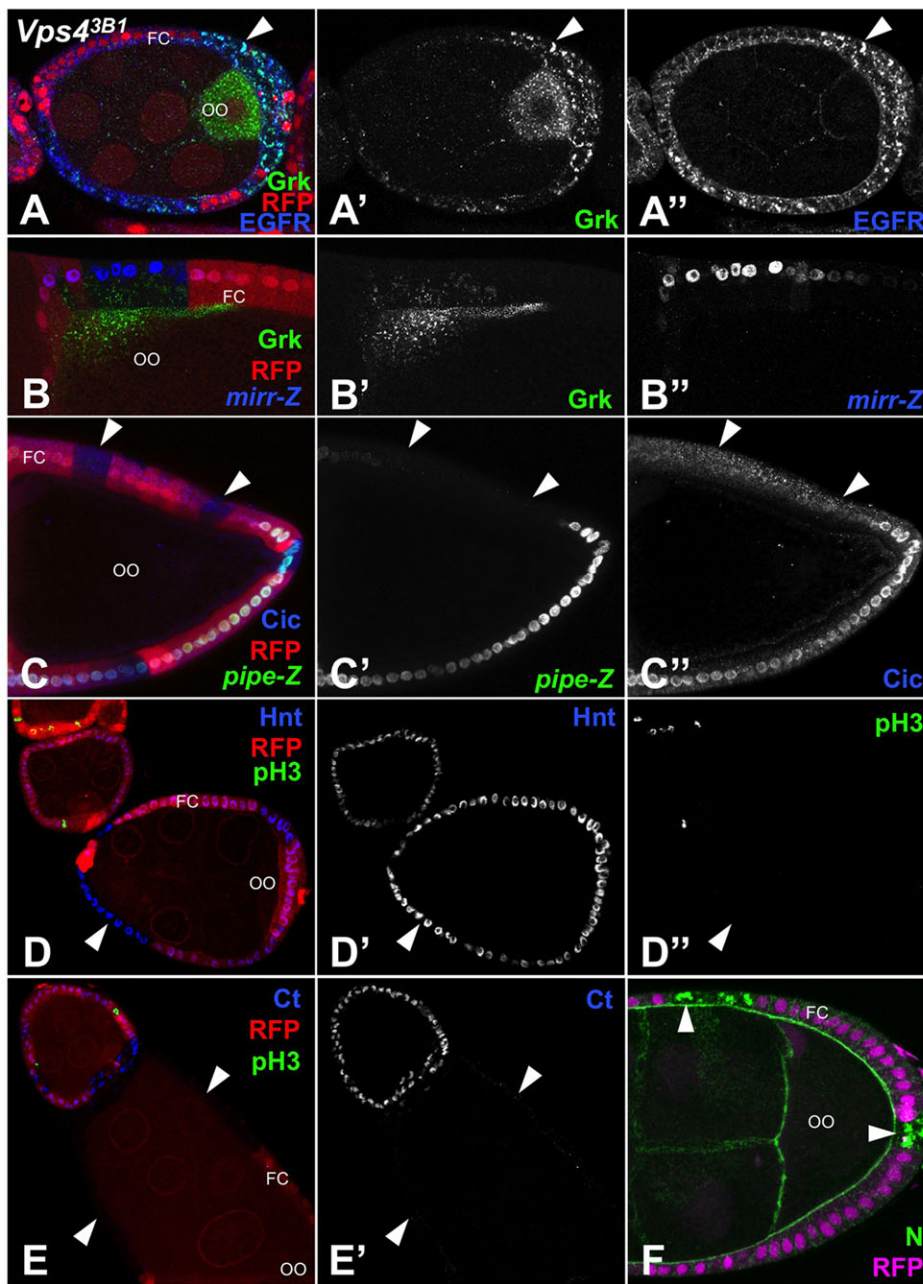

**Fig. 7. *Vps4* is not required for EGFR or Notch signaling in follicle cells.** All panels show egg chambers with *Vps4*<sup>3B1</sup> mutant clones in the follicle cells (FC) marked by the absence of RFP (red in A-E, magenta in F). OO, oocyte. Posterior is to the right. Arrowheads indicate representative clones. (A) Staining for Grk (A', green in A) and EGFR (A'', blue in A) reveals that internalized Grk and EGFR accumulate and colocalize in mutant follicle cells. (B-C) Dorsal is up. (B) A mutant clone in follicle cells dorsal to the oocyte shows normal *mirr-lacZ* expression (B'', blue in B) and Grk internalization (B', green in B). (C) Dorsal mutant follicle cell clones do not misexpress *pipe-lacZ* (C', green in C) and *Cic* remains cytoplasmic, rather than localizing to the nucleus as seen in the ventral region (C'', blue in C). (D,E) *Hnt* (D', blue in D) is expressed normally and there is no ectopic phospho-histone H3 (pH3) staining (D'', green in D,E) in *Vps4* clones. *Ct* (E', blue in E) is not misexpressed in *Vps4* clones. Loss of Notch signaling would cause loss of *Hnt* and ectopic *Ct* and pH3 in egg chambers older than stage 6. (F) Notch (green) accumulates in puncta in *Vps4* clones.

of the receptor to late endosomes is blocked by loss of the ESCRT-II subunit *Vps25* (Thompson et al., 2005) and perhaps also *Vps4*.

#### ***Vps4* has effects distinct from other ESCRT complex subunits**

*Vps4* mutants differ from previously described ESCRT mutations in their effects on Notch and EGFR signaling. Internalization of these receptors into the ILVs of MVBs segregates their intracellular domains from cytoplasmic effectors and should thus terminate signaling (Piper and Lehner, 2011). This model is consistent with the excessive Notch and EGFR signaling observed in eye and wing discs in the absence of many ESCRT proteins (Aoyama et al., 2013; Moberg et al., 2005; Rodahl et al., 2009b; Thompson et al., 2005; Vaccari and Bilder, 2005; Vaccari et al., 2009). This increased signaling has been attributed to the lack of lysosomal degradation of these receptors and their continued activity on the endosomal membrane.

*Vps4* mutant cells instead show reduced expression of EGFR and Notch target genes, despite endosomal accumulation of the receptors. *Vps4*<sup>3B1</sup> cells also fail to induce the non-autonomous overgrowth that results from misexpression of the Notch target gene *unpaired* (FlyBase – *outstretched*) in cells mutant for other ESCRT subunits (Thompson et al., 2005; Vaccari and Bilder, 2005). Notch cleavage and signaling is thought to occur in partially acidified endosomes and thus to require progression through the endocytic pathway (Schneider et al., 2013; Vaccari et al., 2010, 2008; Yan et al., 2009). Although EGFR signaling can occur at the plasma membrane (Brankatschk et al., 2012; Legent et al., 2012; Sousa et al., 2012), some studies suggest that receptor progression from early to late endosomes has a positive effect on signaling (Kim et al., 2007; Miura et al., 2008; Teis et al., 2006). Loss of *Vps4* might block endocytosis so late in the process of ILV formation that the intracellular domains of receptors are trapped in nascent ILV buds and no longer have access to the cytoplasm. Alternatively, an early



block in receptor progression through endocytosis due to failure to recycle other ESCRT subunits (Babst et al., 1998) could reduce signaling.

### Vps4 might contribute to EGFR activation

Another possible explanation for the effect of *Vps4* on EGFR signaling is suggested by our finding that loss of *shi* function does not restore EGFR signaling to *Vps4* mutant cells, even though it blocks receptor accumulation in the endocytic pathway. Dynamin is required to internalize mammalian EGFR by both clathrin-dependent and -independent mechanisms following its activation with all the ligands tested (Henriksen et al., 2013). In the absence of Dynamin, prolonged signaling of EGFR on the plasma membrane should be unaffected by defects in the late stages of endocytosis. The disruption of EGFR signaling by *Vps4* in *shi* mutant cells thus suggests that *Vps4* has a role upstream of cell surface EGFR activation that is distinct from its function in endocytic MVBs. This model is supported by our observation that a constitutively active form of EGFR can partially rescue *Vps4* mutant cells (Fig. 5E). In addition, although *Vps4* affects the progression of EGFR and its ligand Grk, as well as Notch, through the endocytic pathway in follicle cells, signaling by both receptors remains intact in these cells, indicating that the two functions of *Vps4* are separable.

The mechanism of this new effect of *Vps4* is still unknown. As *Vps4* mutant clones accumulate high levels of intracellular EGFR, *Vps4* is not required for EGFR transcription or translation. Although some studies have implicated ESCRT-III and *Vps4* in recycling Ras and associated EGFR to the plasma membrane (Baldys and Raymond, 2009; Tu et al., 2011; Zheng et al., 2012), *Drosophila* Ras need not be associated with the membrane to function in photoreceptor recruitment (Sung et al., 2010), and a requirement for *Vps4* in EGFR recycling would not explain its effect in the absence of Dynamin-mediated internalization. *Vps4* has been reported to transport some newly synthesized proteins to the plasma membrane via endosomes (Futter et al., 1995; Yoshimori et al., 2000). However, the ability of *Vps4* mutant follicle cells to internalize Grk indicates that EGFR is present on the plasma membrane of these cells. It is possible that EGFR is trafficked by distinct routes in imaginal discs and in follicle cells. Grk is internalized through the apical domain of follicle cells (Tanentzapf et al., 2000), whereas active forms of Spi are localized basolaterally in discs (Steinhauer et al., 2013). A role for *Vps4* in targeting the EGFR to the appropriate membrane domain would, however, not explain the requirement for *Vps4* in cultured S2 cells, which lack apical-basal polarity. An alternative possibility is that *Vps4* affects EGFR activation independently of its trafficking. *Vps4* is involved in transporting cholesterol to the endoplasmic reticulum (Du et al., 2013), and could indirectly affect EGFR activation by altering the composition of membrane rafts (Balbis and Posner, 2010). Loss of *Vps4* in yeast was recently shown to result in the accumulation of misassembled nuclear pore complexes (Webster et al., 2014); although it seems unlikely that this would influence EGFR activation, it supports the existence of previously undescribed functions for *Vps4*. Further investigation of the effect of *Vps4* on EGFR activity might define a new molecular mechanism of action for this versatile protein.

## MATERIALS AND METHODS

### *Drosophila* genetics

*3B1* is an EMS-induced lethal allele of *Vps4* isolated previously (Legent et al., 2012). Using rescue by X chromosomal duplications followed by recombination with P-element markers (Zhai et al., 2003), we mapped it to a

0.35 cM interval in 16F1-5. The coding region of *Vps4* amplified from homozygous mutant larvae contained a missense mutation, E209K, that was absent from the *y,w*, *FRT19A* isogenic strain used for the mutagenesis. The rescuing duplication *Dp(1;3)JC153 (R1)* was obtained from Alberto Ferrus (Cajal Institute, Madrid, Spain). *hep<sup>75</sup>* (Glise et al., 1995) is a deletion of nucleotides 486 to 1346 that removes the start codon. Other stocks used were *wg-lacZ<sup>P</sup>*, *puc-lacZ<sup>E69</sup>*, *UAS-puc<sup>2A</sup>*, *Hrs<sup>D28</sup>*, *Df(Hrs)* [Exel6277], *aos-lacZ<sup>W11</sup>*, *hh-lacZ<sup>P30</sup>*, *mirr-lacZ<sup>Cre2</sup>* (Bloomington *Drosophila* Stock Center), *E(spl)mβ-CD2* (de Celis et al., 1998), *pipe-lacZ* (Andreu et al., 2012), *vps4<sup>A7b</sup>* (Rodahl et al., 2009a), *Dronc<sup>129</sup>* (Xu et al., 2005), *shi<sup>7C7</sup>* (Legent et al., 2012), *shi<sup>FL54</sup>* (Windler and Bilder, 2010), *UAS-shi<sup>ts</sup>* (Kitamoto, 2001), *TSG101<sup>2</sup>* (Moberg et al., 2005), *UAS-rhomboid* (Lee et al., 2001), *UAS-sSpi* (Schweitzer et al., 1995), *UAS-EGFR<sup>Δtop</sup>* (Queenan et al., 1997) and *UAS-Ras<sup>V12</sup>* (Karim and Rubin, 1998).

Stocks used to generate clones were: (1) *w*, *hsFLP<sup>122</sup>*, *P[w+, ubi-GFP]*, *FRT19A*, (2) *y,w*, *hsFLP<sup>122</sup>*, *P[w+, ubi-RFP]*, *FRT19A*, (3) *w*, *eyFLP1*, *tub-GAL80*, *FRT19A*; *tub-GAL4*, *UAS-CD8::GFP/SM6-TM6B*, (4) *w*, *hsFLP<sup>122</sup>*, *tub-GAL80*, *FRT19A*; *tub-GAL4*, *UAS-CD8::GFP/SM6-TM6B*, (5) *w*, *eyFLP1*, *P[w+, ubi-GFP]*, *FRT19A*; *Dronc<sup>129</sup>/TM6B*, (6) *w*, *hsFLP<sup>122</sup>*, *P[w+, ubi-GFP]*, *FRT19A*; *Dronc<sup>129</sup>/TM6B* and (7) *w*, *hsFLP<sup>122</sup>*, *P[w+, ubi-RFP]*, *FRT19A*; *Dronc<sup>129</sup>/TM6B*.

### Molecular biology

The full-length *Vps4* (*CG6842*) coding region was amplified by PCR from the GH02678 EST clone (*Drosophila* Genomics Resource Center) using Pfu Turbo and cloned into *pUAST-HA* as an EcoRI-XhoI fragment to generate *pUAST-HA::Vps4*. Transgenic flies were generated by Genetic Services, Inc.

### Immunohistochemistry

Third-instar eye and wing discs were dissected and stained as described previously (Legent and Treisman, 2008). Ovaries were stained as described previously (Miura et al., 2006). Antibodies used were: rabbit anti-β-galactosidase (1:5000, Cappel), chicken anti-GFP (1:500, Aves), mouse anti-HA (1:100, Covance), mouse anti-CD2 (1:50, Serotec), rabbit anti-active Caspase 3 (1:500, CM1, BD Pharmingen), rabbit anti-Ato (1:5000; Jarman et al., 1993), guinea pig anti-Sens (1:1000; Nolo et al., 2000), mouse anti-N<sup>ECD</sup> (1:10), mouse anti-DI<sup>ECD</sup> (1:10), mouse anti-Wg (1:10), mouse anti-Ct (1:10), mouse anti-Grk (1:10), rat anti-Elav (1:100) (all Developmental Studies Hybridoma Bank, University of Iowa), rabbit anti-EGFR<sup>TER</sup> (1:500; Rodrigues et al., 2005), mouse anti-EGFR<sup>EXT</sup> (1:200, Sigma E2906), rabbit anti-phospho-Smad (1:50, Cell Signaling 9516), guinea pig anti-Hrs (1:200; Lloyd et al., 2002), rabbit anti-Rab5 (1:50; Wucherpennig et al., 2003), rabbit anti-Rab11 (1:1000; Satoh et al., 2005), chicken anti-Syx7 (1:500; Lu and Bilder, 2005), rabbit anti-Lva (1:5000; Sisson et al., 2000), guinea pig anti-Sec15 (1:500; Mehta et al., 2005), and rabbit anti-Cic (1:5000; Astigarraga et al., 2007). Secondary antibodies used were from Jackson ImmunoResearch (1:200) or Molecular Probes (1:1000). Images were taken on a Leica SP5 confocal microscope. For *shi<sup>ts</sup>* stainings, larvae were maintained at 31°C for 48 h prior to dissection.

Antibodies used for western blotting were mouse anti-diphosphorylated ERK (dpERK, 1:2500, Sigma M8159), rabbit anti-ERK (1:20,000, Cell Signaling 4695), mouse anti-Aos (1:100, Developmental Studies Hybridoma Bank), and mouse anti-β-Tubulin (1:3000, Covance MMS-410P) antibodies.

### Cell culture

EGFR-expressing S2 (D2F) cells (Schweitzer et al., 1995) were maintained in Schneider's medium supplemented with 10% fetal calf serum and 150 μg/ml G418. Double-stranded RNAs (dsRNAs) were generated using the MEGAscript T7 and T3 Kits (Ambion) as described previously (Roignant et al., 2006) and 15 μg dsRNA were used to treat 10<sup>6</sup> cells per well for 5 days. EGFR expression was induced for 3 h with 60 μM Cu<sub>2</sub>SO<sub>4</sub>. For dpERK (pMAPK) western blots, the cells were treated with purified His-sSpiCS (Miura et al., 2006) for 10 min, and lysed as described previously (Miura et al., 2008). For Aos western blots, cells were serum-starved in medium containing dsRNA, and treated with purified His-sSpiCS for 16 h. Media were then harvested and the cells were lysed in ice-cold 50 mM Tris-HCl pH 7.5, 150 mM NaCl, 1% Triton X-100 and protease inhibitors

(Roche). Western blotting was carried out as described previously (Miura et al., 2006). Total RNA was extracted from D2F cells using Trizol (Invitrogen). RT-PCR was performed on 1 µg of total RNA using the Invitrogen SuperScript First-Strand Kit. Primer sequences are available on request.

#### Acknowledgements

We thank Minrong Ai, Hugo Bellen, David Bilder, Alberto Ferrus, Marcos Gonzalez-Gaitan, Andrew Jarman, Gerardo Jimenez, Daniel Marenda, Don Ready, Aloma Rodrigues, Hyung Don Ryoo, Benny Shilo, Harald Stenmark, the *Drosophila* Genomics Resource Center, the Bloomington *Drosophila* Stock Center and the Developmental Studies Hybridoma Bank for fly stocks and reagents. We are grateful to Antoine Guichet for his support. The manuscript was improved by the critical comments of Sergio Astigarraga, Justine Oyallon, Josefa Steinhauer and Annabelle Suisse.

#### Competing interests

The authors declare no competing or financial interests.

#### Author contributions

K.L. and J.E.T. designed experiments; K.L., H.H.L. and J.E.T. performed experiments; K.L. and J.E.T. wrote the manuscript.

#### Funding

This work was supported by the National Institutes of Health [EY013777 to J.E.T.]. Deposited in PMC for release after 12 months.

#### Supplementary material

Supplementary material available online at <http://dev.biologists.org/lookup/suppl/doi:10.1242/dev.117960/-DC1>

#### References

- Adell, M. A. Y., Vogel, G. F., Pakdel, M., Muller, M., Lindner, H., Hess, M. W. and Teis, D. (2014). Coordinated binding of Vps4 to ESCRT-III drives membrane neck constriction during MVB vesicle formation. *J. Cell Biol.* **205**, 33-49.
- Andersson, E. R. (2012). The role of endocytosis in activating and regulating signal transduction. *Cell. Mol. Life Sci.* **69**, 1755-1771.
- Andreu, M. J., Gonzalez-Perez, E., Ajuria, L., Samper, N., Gonzalez-Crespo, S., Campuzano, S. and Jimenez, G. (2012). Mirror represses *pipe* expression in follicle cells to initiate dorsoventral axis formation in *Drosophila*. *Development* **139**, 1110-1114.
- Aoyama, N., Yamakawa, T., Sasamura, T., Yoshida, Y., Otori, M., Okubo, H., Iida, E., Sasaki, N., Ueda, R. and Matsuno, K. (2013). Loss- and gain-of-function analyses of *vacuolar protein sorting 2* in Notch signaling of *Drosophila melanogaster*. *Genes Genet. Syst.* **88**, 45-57.
- Assaker, G., Ramel, D., Wculek, S. K., Gonzalez-Gaitan, M. and Emery, G. (2010). Spatial restriction of receptor tyrosine kinase activity through a polarized endocytic cycle controls border cell migration. *Proc. Natl. Acad. Sci. USA* **107**, 22558-22563.
- Astigarraga, S., Grossman, R., Díaz-Delfín, J., Caelles, C., Paroush, Z. and Jiménez, G. (2007). A MAPK docking site is critical for downregulation of Capicua by Torso and EGFR RTK signaling. *EMBO J.* **26**, 668-677.
- Atkey, M. R., Lachance, J.-F. B., Walczak, M., Rebello, T. and Nilson, L. A. (2006). Capicua regulates follicle cell fate in the *Drosophila* ovary through repression of *mirror*. *Development* **133**, 2115-2123.
- Babst, M., Wendland, B., Estepa, E. J. and Emr, S. D. (1998). The Vps4p AAA ATPase regulates membrane association of a Vps protein complex required for normal endosome function. *EMBO J.* **17**, 2982-2993.
- Babst, M., Odorizzi, G., Estepa, E. J. and Emr, S. D. (2000). Mammalian Tumor susceptibility gene 101 (TSG101) and the yeast homologue, Vps23p, both function in late endosomal trafficking. *Traffic* **1**, 248-258.
- Bache, K. G., Stuffers, S., Malerød, L., Slagsvold, T., Raiborg, C., Lechardeur, D., Wälchli, S., Lukacs, G. L., Brech, A. and Stenmark, H. (2006). The ESCRT-III subunit hVps24 is required for degradation but not silencing of the epidermal growth factor receptor. *Mol. Biol. Cell* **17**, 2513-2523.
- Balbis, A. and Posner, B. I. (2010). Compartmentalization of EGFR in cellular membranes: role of membrane rafts. *J. Cell. Biochem.* **109**, 1103-1108.
- Baldys, A. and Raymond, J. R. (2009). Critical role of ESCRT machinery in EGFR recycling. *Biochemistry* **48**, 9321-9323.
- Barajas, D., de Castro Martin, I. F., Pogany, J., Risco, C. and Nagy, P. D. (2014). Noncanonical role for the host Vps4 AAA+ ATPase ESCRT protein in the formation of Tomato bushy stunt virus replicase. *PLoS Pathog.* **10**, e1004087.
- Bennett, D. and Alphey, L. (2002). PP1 binds Sara and negatively regulates Dpp signaling in *Drosophila melanogaster*. *Nat. Genet.* **31**, 419-423.
- Brankatschk, B., Wichert, S. P., Johnson, S. D., Schaad, O., Rossner, M. J. and Gruenberg, J. (2012). Regulation of the EGF transcriptional response by endocytic sorting. *Sci. Signal.* **5**, ra21.
- Callejo, A., Biloni, A., Mollica, E., Gorfinkiel, N., Andres, G., Ibanez, C., Torroja, C., Doglio, L., Sierra, J. and Guerrero, I. (2011). Dispatched mediates Hedgehog basolateral release to form the long-range morphogenetic gradient in the *Drosophila* wing disc epithelium. *Proc. Natl. Acad. Sci. USA* **108**, 12591-12598.
- Cashikar, A. G., Shim, S., Roth, R., Maldazys, M. R., Heuser, J. E. and Hanson, P. I. (2014). Structure of cellular ESCRT-III spirals and their relationship to HIV budding. *eLife* e02184.
- Chang, W.-L., Liou, W., Pen, H.-C., Chou, H.-Y., Chang, Y.-W., Li, W.-H., Chiang, W. and Pai, L.-M. (2008). The gradient of Gurken, a long-range morphogen, is directly regulated by Cbl-mediated endocytosis. *Development* **135**, 1923-1933.
- Chanut-Delalande, H., Jung, A. C., Baer, M. M., Lin, L., Payre, F. and Affolter, M. (2010). The Hrs/Stam complex acts as a positive and negative regulator of RTK signaling during *Drosophila* development. *PLoS ONE* **5**, e10245.
- Choudhuri, K., Llodrá, J., Roth, E. W., Tsai, J., Gordo, S., Wucherpennig, K. W., Kam, L. C., Stokes, D. L. and Dustin, M. L. (2014). Polarized release of T-cell-receptor-enriched microvesicles at the immunological synapse. *Nature* **507**, 118-123.
- de Celis, J. F., Garcia-Bellido, A. and Bray, S. J. (1996). Activation and function of Notch at the dorsal-ventral boundary of the wing imaginal disc. *Development* **122**, 359-369.
- de Celis, J. F., Tyler, D. M., de Celis, J. and Bray, S. J. (1998). Notch signalling mediates segmentation of the *Drosophila* leg. *Development* **125**, 4617-4626.
- de Gassart, A., Gémard, C., Hoekstra, D. and Vidal, M. (2004). Exosome secretion: the art of reutilizing nonrecycled proteins? *Traffic* **5**, 896-903.
- Dhanasekaran, D. N. and Reddy, E. P. (2008). JNK signaling in apoptosis. *Oncogene* **27**, 6245-6251.
- Dobrowolski, R., Vick, P., Ploper, D., Gumper, I., Snitkin, H., Sabatini, D. D. and De Robertis, E. M. (2012). Presenilin deficiency or lysosomal inhibition enhances Wnt signaling through relocalization of GSK3 to the late-endosomal compartment. *Cell Rep.* **2**, 1316-1328.
- Du, X., Kazim, A. S., Dawes, I. W., Brown, A. J. and Yang, H. (2013). The AAA ATPase VPS4/SKD1 regulates endosomal cholesterol trafficking independently of ESCRT-III. *Traffic* **14**, 107-119.
- Eden, E. R., Huang, F., Sorkin, A. and Futter, C. E. (2012). The role of EGF receptor ubiquitination in regulating its intracellular traffic. *Traffic* **13**, 329-337.
- Frankfort, B. J., Nolo, R., Zhang, Z., Bellen, H. and Mardon, G. (2001). Senseless repression of *rough* is required for R8 photoreceptor differentiation in the developing *Drosophila* eye. *Neuron* **32**, 403-414.
- Freeman, M. (1994). The *spitz* gene is required for photoreceptor determination in the *Drosophila* eye where it interacts with the EGF receptor. *Mech. Dev.* **48**, 25-33.
- Freeman, M. (1996). Reiterative use of the EGF receptor triggers differentiation of all cell types in the *Drosophila* eye. *Cell* **87**, 651-660.
- Freeman, M. (1997). Cell determination strategies in the *Drosophila* eye. *Development* **124**, 261-270.
- French, A. R., Tadaki, D. K., Niyogi, S. K. and Lauffenburger, D. A. (1995). Intracellular trafficking of epidermal growth factor family ligands is directly influenced by the pH sensitivity of the receptor/ligand interaction. *J. Biol. Chem.* **270**, 4334-4340.
- Futter, C. E., Connolly, C. N., Cutler, D. F. and Hopkins, C. R. (1995). Newly synthesized transferrin receptors can be detected in the endosome before they appear on the cell surface. *J. Biol. Chem.* **270**, 10999-11003.
- Glise, B., Bourbon, H. and Noselli, S. (1995). *hemipterous* encodes a novel *Drosophila* MAP kinase kinase, required for epithelial cell sheet movement. *Cell* **83**, 451-461.
- Golembo, M., Schweitzer, R., Freeman, M. and Shilo, B. Z. (1996). *argos* transcription is induced by the *Drosophila* EGF receptor pathway to form an inhibitory feedback loop. *Development* **122**, 223-230.
- Halfar, K., Rommel, C., Stocker, H. and Hafen, E. (2001). Ras controls growth, survival and differentiation in the *Drosophila* eye by different thresholds of MAP kinase activity. *Development* **128**, 1687-1696.
- Hanson, P. I. and Cashikar, A. (2012). Multivesicular body morphogenesis. *Annu. Rev. Cell Dev. Biol.* **28**, 337-362.
- Henne, W. M., Buchkovich, N. J., Zhao, Y. and Emr, S. D. (2012). The endosomal sorting complex ESCRT-II mediates the assembly and architecture of ESCRT-III helices. *Cell* **151**, 356-371.
- Henriksen, L., Grandal, M. V., Knudsen, S. L. J., van Deurs, B. and Grøvdal, L. M. (2013). Internalization mechanisms of the epidermal growth factor receptor after activation with different ligands. *PLoS ONE* **8**, e58148.
- Jarman, A. P., Grau, Y., Jan, L. Y. and Jan, Y. N. (1993). *atonal* is a proneural gene that directs chordotonal organ formation in the *Drosophila* peripheral nervous system. *Cell* **73**, 1307-1321.
- Jékely, G., Sung, H.-H., Luque, C. M. and Rørth, P. (2005). Regulators of endocytosis maintain localized receptor tyrosine kinase signaling in guided migration. *Dev. Cell* **9**, 197-207.

- Jimenez, A. J., Maiuri, P., Lafaurie-Janvore, J., Divoux, S., Piel, M. and Perez, F.** (2014). ESCRT machinery is required for plasma membrane repair. *Science* **343**, 1247136.
- Jones, S. and Rappoport, J. Z.** (2014). Interdependent Epidermal growth factor receptor signalling and trafficking. *Int. J. Biochem. Cell Biol.* **51**, 23-28.
- Karim, F. D. and Rubin, G. M.** (1998). Ectopic expression of activated Ras1 induces hyperplastic growth and increased cell death in *Drosophila* imaginal tissues. *Development* **125**, 1-9.
- Kim, H. J., Taylor, L. J. and Bar-Sagi, D.** (2007). Spatial regulation of EGFR signaling by Sprouty2. *Curr. Biol.* **17**, 455-461.
- Kitamoto, T.** (2001). Conditional modification of behavior in *Drosophila* by targeted expression of a temperature-sensitive *shibire* allele in defined neurons. *J. Neurobiol.* **47**, 81-92.
- Langevin, J., Morgan, M. J., Sibarita, J.-B., Aresta, S., Murthy, M., Schwarz, T., Camonis, J. and Bellaïche, Y.** (2005). *Drosophila* exocyst components Sec5, Sec6, and Sec15 regulate DE-Cadherin trafficking from recycling endosomes to the plasma membrane. *Dev. Cell* **9**, 365-376.
- Lata, S., Schoehn, G., Jain, A., Pires, R., Piehler, J., Gottlinger, H. G. and Weissenhorn, W.** (2008). Helical structures of ESCRT-III are disassembled by VPS4. *Science* **321**, 1354-1357.
- Lee, J. R., Urban, S., Garvey, C. F. and Freeman, M.** (2001). Regulated intracellular ligand transport and proteolysis control EGF signal activation in *Drosophila*. *Cell* **107**, 161-171.
- Legent, K. and Treisman, J. E.** (2008). Wingless signaling in *Drosophila* eye development. *Methods Mol. Biol.* **469**, 141-161.
- Legent, K., Steinhauer, J., Richard, M. and Treisman, J. E.** (2012). A screen for X-linked mutations affecting *Drosophila* photoreceptor differentiation identifies Casein kinase 1alpha as an essential negative regulator of Wingless signaling. *Genetics* **190**, 601-616.
- Lloyd, T. E., Atkinson, R., Wu, M. N., Zhou, Y., Pennetta, G. and Bellen, H. J.** (2002). Hrs regulates endosome membrane invagination and tyrosine kinase receptor signaling in *Drosophila*. *Cell* **108**, 261-269.
- Lu, H. and Bilder, D.** (2005). Endocytic control of epithelial polarity and proliferation in *Drosophila*. *Nat. Cell Biol.* **7**, 1232-1239.
- Martin-Blanco, E., Gampel, A., Ring, J., Virdee, K., Kirov, N., Tolkovsky, A. M. and Martinez-Arias, A.** (1998). *puckered* encodes a phosphatase that mediates a feedback loop regulating JNK activity during dorsal closure in *Drosophila*. *Genes Dev.* **12**, 557-570.
- Mehta, S. Q., Hiesinger, P. R., Beronja, S., Zhai, R. G., Schulze, K. L., Verstreken, P., Cao, Y., Zhou, Y., Tepass, U., Crair, M. C. et al.** (2005). Mutations in *Drosophila sec15* reveal a function in neuronal targeting for a subset of exocyst components. *Neuron* **46**, 219-232.
- Miaczynska, M., Pelkmans, L. and Zerial, M.** (2004). Not just a sink: endosomes in control of signal transduction. *Curr. Opin. Cell Biol.* **16**, 400-406.
- Miura, G. I., Buglino, J., Alvarado, D., Lemmon, M. A., Resh, M. D. and Treisman, J. E.** (2006). Palmitoylation of the EGFR ligand Spitz by Rasp increases Spitz activity by restricting its diffusion. *Dev. Cell* **10**, 167-176.
- Miura, G. I., Roignant, J.-Y., Wassef, M. and Treisman, J. E.** (2008). Myopic acts in the endocytic pathway to enhance signaling by the *Drosophila* EGF receptor. *Development* **135**, 1913-1922.
- Moberg, K. H., Schelble, S., Burdick, S. K. and Hariharan, I. K.** (2005). Mutations in *erupted*, the *Drosophila* ortholog of mammalian *tumor susceptibility gene 101*, elicit non-cell-autonomous overgrowth. *Dev. Cell* **9**, 699-710.
- Monroe, N., Han, H., Gonciarz, M. D., Eckert, D. M., Karren, M. A., Whitby, F. G., Sundquist, W. I. and Hill, C. P.** (2014). The oligomeric state of the active Vps4 AAA ATPase. *J. Mol. Biol.* **426**, 510-525.
- Morita, E.** (2012). Differential requirements of mammalian ESCRTs in multivesicular body formation, virus budding and cell division. *FEBS J.* **279**, 1399-1406.
- Mueller, M., Adell, M. A. Y. and Teis, D.** (2012). Membrane abscission: first glimpse at dynamic ESCRTs. *Curr. Biol.* **22**, R603-R605.
- Musse, A. A., Meloty-Kapella, L. and Weinmaster, G.** (2012). Notch ligand endocytosis: mechanistic basis of signaling activity. *Semin. Cell Dev. Biol.* **23**, 429-436.
- Nabhan, J. F., Hu, R., Oh, R. S., Cohen, S. N. and Lu, Q.** (2012). Formation and release of arrestin domain-containing protein 1-mediated microvesicles (ARMMs) at plasma membrane by recruitment of TSG101 protein. *Proc. Natl. Acad. Sci. USA* **109**, 4146-4151.
- Neumann, C. J. and Cohen, S. M.** (1997). Long-range action of Wingless organizes the dorsal-ventral axis of the *Drosophila* wing. *Development* **124**, 871-880.
- Nilson, L. A. and Schüpbach, T.** (1998). EGF receptor signaling in *Drosophila* oogenesis. *Curr. Top. Dev. Biol.* **44**, 203-243.
- Nolo, R., Abbott, L. A. and Bellen, H. J.** (2000). Senseless, a Zn finger transcription factor, is necessary and sufficient for sensory organ development in *Drosophila*. *Cell* **102**, 349-362.
- Panopoulou, E., Gillooly, D. J., Wrana, J. L., Zerial, M., Stenmark, H., Murphy, C. and Fotsis, T.** (2002). Early endosomal regulation of Smad-dependent signaling in endothelial cells. *J. Biol. Chem.* **277**, 18046-18052.
- Parker, D. S., Jemison, J. and Cadigan, K. M.** (2002). Pygopus, a nuclear PHD-finger protein required for Wingless signaling in *Drosophila*. *Development* **129**, 2565-2576.
- Piper, R. C. and Lehner, P. J.** (2011). Endosomal transport via ubiquitination. *Trends Cell Biol.* **21**, 647-655.
- Queenan, A. M., Ghabrial, A. and Schupbach, T.** (1997). Ectopic activation of Torpedo/Egfr, a *Drosophila* receptor tyrosine kinase, dorsalizes both the eggshell and the embryo. *Development* **124**, 3871-3880.
- Raiborg, C. and Stenmark, H.** (2009). The ESCRT machinery in endosomal sorting of ubiquitylated membrane proteins. *Nature* **458**, 445-452.
- Razi, M. and Futter, C. E.** (2006). Distinct roles for Tsg101 and Hrs in multivesicular body formation and inward vesiculation. *Mol. Biol. Cell* **17**, 3469-3483.
- Robinow, S. and White, K.** (1991). Characterization and spatial distribution of the ELAV protein during *Drosophila melanogaster* development. *J. Neurobiol.* **22**, 443-461.
- Rodahl, L. M., Haglund, K., Sem-Jacobsen, C., Wendler, F., Vincent, J.-P., Lindmo, K., Rusten, T. E. and Stenmark, H.** (2009a). Disruption of Vps4 and JNK function in *Drosophila* causes tumour growth. *PLoS ONE* **4**, e4354.
- Rodahl, L. M., Stuffers, S., Lobert, V. H. and Stenmark, H.** (2009b). The role of ESCRT proteins in attenuation of cell signalling. *Biochem. Soc. Trans.* **37**, 137-142.
- Rodrigues, A. B., Werner, E. and Moses, K.** (2005). Genetic and biochemical analysis of the role of Egfr in the morphogenetic furrow of the developing *Drosophila* eye. *Development* **132**, 4697-4707.
- Roepstorff, K., Grandal, M. V., Henriksen, L., Knudsen, S. L. J., Lerdrup, M., Grøvdal, L., Willumsen, B. M. and van Deurs, B.** (2009). Differential effects of EGFR ligands on endocytic sorting of the receptor. *Traffic* **10**, 1115-1127.
- Rogers, E. M., Brennan, C. A., Mortimer, N. T., Cook, S., Morris, A. R. and Moses, K.** (2005). Pointed regulates an eye-specific transcriptional enhancer in the *Drosophila hedgehog* gene, which is required for the movement of the morphogenetic furrow. *Development* **132**, 4833-4843.
- Roignant, J.-Y. and Treisman, J. E.** (2010). Exon junction complex subunits are required to splice *Drosophila* MAP kinase, a large heterochromatic gene. *Cell* **143**, 238-250.
- Roignant, J.-Y., Hamel, S., Janody, F. and Treisman, J. E.** (2006). The novel SAM domain protein Aveugle is required for Raf activation in the *Drosophila* EGF receptor signaling pathway. *Genes Dev.* **20**, 795-806.
- Russell, M. R. G., Shideler, T., Nickerson, D. P., West, M. and Odorizzi, G.** (2012). Class E compartments form in response to ESCRT dysfunction in yeast due to hyperactivity of the Vps21 Rab GTPase. *J. Cell Sci.* **125**, 5208-5220.
- Satoh, A. K., O'Tousa, J. E., Ozaki, K. and Ready, D. F.** (2005). Rab11 mediates post-Golgi trafficking of rhodopsin to the photosensitive apical membrane of *Drosophila* photoreceptors. *Development* **132**, 1487-1497.
- Schmid, S. L. and Frolov, V. A.** (2011). Dynamin: functional design of a membrane fission catalyst. *Annu. Rev. Cell Dev. Biol.* **27**, 79-105.
- Schneider, M., Troost, T., Grawe, F., Martinez-Arias, A. and Klein, T.** (2013). Activation of Notch in *Igd* mutant cells requires the fusion of late endosomes with the lysosome. *J. Cell Sci.* **126**, 645-656.
- Schweitzer, R., Shaharabany, M., Seger, R. and Shilo, B. Z.** (1995). Secreted Spitz triggers the DER signaling pathway and is a limiting component in embryonic ventral ectoderm determination. *Genes Dev.* **9**, 1518-1529.
- Scott, A., Chung, H.-Y., Gonciarz-Swiatek, M., Hill, G. C., Whitby, F. G., Gaspar, J., Holton, J. M., Viswanathan, R., Ghaffarian, S., Hill, C. P. et al.** (2005). Structural and mechanistic studies of VPS4 proteins. *EMBO J.* **24**, 3658-3669.
- Seto, E. S. and Bellen, H. J.** (2006). Internalization is required for proper Wingless signaling in *Drosophila melanogaster*. *J. Cell Biol.* **173**, 95-106.
- Shilo, B.-Z.** (2003). Signaling by the *Drosophila* epidermal growth factor receptor pathway during development. *Exp. Cell Res.* **284**, 140-149.
- Shilo, B.-Z. and Schejter, E. D.** (2011). Regulation of developmental intercellular signalling by intracellular trafficking. *EMBO J.* **30**, 3516-3526.
- Sigismund, S., Woelk, T., Puri, C., Maspero, E., Tacchetti, C., Transidico, P., Di Fiore, P. P. and Polo, S.** (2005). Clathrin-independent endocytosis of ubiquitinated cargos. *Proc. Natl. Acad. Sci. USA* **102**, 2760-2765.
- Sisson, J. C., Field, C., Ventura, R., Royou, A. and Sullivan, W.** (2000). Lava lamp, a novel peripheral golgi protein, is required for *Drosophila melanogaster* cellularization. *J. Cell Biol.* **151**, 905-918.
- Sousa, L. P., Lax, I., Shen, H., Ferguson, S. M., De Camilli, P. and Schlessinger, J.** (2012). Suppression of EGFR endocytosis by dynamin depletion reveals that EGFR signaling occurs primarily at the plasma membrane. *Proc. Natl. Acad. Sci. USA* **109**, 4419-4424.
- Steinhauer, J., Liu, H. H., Miller, E. and Treisman, J. E.** (2013). Trafficking of the EGFR ligand Spitz regulates its signaling activity in polarized tissues. *J. Cell Sci.* **126**, 4469-4478.
- Steller, H.** (2008). Regulation of apoptosis in *Drosophila*. *Cell Death Differ.* **15**, 1132-1138.
- Stetak, A., Hoier, E. F., Croce, A., Cassata, G., Di Fiore, P. P. and Hajnal, A.** (2006). Cell fate-specific regulation of EGF receptor trafficking during *Caenorhabditis elegans* vulval development. *EMBO J.* **25**, 2347-2357.
- Sturtevant, M. A., Roark, M. and Bier, E.** (1993). The *Drosophila rhomboid* gene mediates the localized formation of wing veins and interacts genetically with components of the EGF-R signaling pathway. *Genes Dev.* **7**, 961-973.
- Sun, J. and Deng, W.-M.** (2007). Hindsight mediates the role of Notch in suppressing Hedgehog signaling and cell proliferation. *Dev. Cell* **12**, 431-442.

- Sung, P. J., Rodrigues, A. B., Kleinberger, A., Quatela, S., Bach, E. A. and Phillips, M. R. (2010). Cytosolic Ras supports eye development in *Drosophila*. *Mol. Cell Biol.* **30**, 5649-5657.
- Taelman, V. F., Dobrowolski, R., Plouhinec, J.-L., Fuentealba, L. C., Vorwald, P. P., Gumper, I., Sabatini, D. D. and De Robertis, E. M. (2010). Wnt signaling requires sequestration of glycogen synthase kinase 3 inside multivesicular endosomes. *Cell* **143**, 1136-1148.
- Tanentzapf, G., Smith, C., McGlade, J. and Tepass, U. (2000). Apical, lateral, and basal polarization cues contribute to the development of the follicular epithelium during *Drosophila* oogenesis. *J. Cell Biol.* **151**, 891-904.
- Tang, B. L. (2012). Membrane trafficking components in cytokinesis. *Cell Physiol. Biochem.* **30**, 1097-1108.
- Tanimoto, H., Itoh, S., ten Dijke, P. and Tabata, T. (2000). Hedgehog creates a gradient of DPP activity in *Drosophila* wing imaginal discs. *Mol. Cell* **5**, 59-71.
- Teis, D., Taub, N., Kurzbauer, R., Hilber, D., de Araujo, M. E., Erlacher, M., Offterdinger, M., Villunger, A., Geley, S., Bohn, G. et al. (2006). p14-MP1-MEK1 signaling regulates endosomal traffic and cellular proliferation during tissue homeostasis. *J. Cell Biol.* **175**, 861-868.
- Thompson, B. J., Mathieu, J., Sung, H.-H., Loeser, E., Rørth, P. and Cohen, S. M. (2005). Tumor suppressor properties of the ESCRT-II complex component Vps25 in *Drosophila*. *Dev. Cell* **9**, 711-720.
- Tio, M., Ma, C. and Moses, K. (1994). Spitz, a *Drosophila* homolog of Transforming growth factor- $\alpha$ , is required in the founding photoreceptor cells of the compound eye facets. *Mech. Dev.* **48**, 13-23.
- Tsukazaki, T., Chiang, T. A., Davison, A. F., Attisano, L. and Wrana, J. L. (1998). SARA, a FYVE domain protein that recruits Smad2 to the TGF $\beta$  receptor. *Cell* **95**, 779-791.
- Tu, C., Ahmad, G., Mohapatra, B., Bhattacharyya, S., Ortega-Cava, C., Chung, B. M., Wagner, K.-U., Raja, S. M., Naramura, M., Band, V. et al. (2011). ESCRT proteins: double-edged regulators of cellular signaling. *Bioarchitecture* **1**, 45-48.
- Ueno, H., Huang, X., Tanaka, Y. and Hirokawa, N. (2011). KIF16B/Rab14 molecular motor complex is critical for early embryonic development by transporting FGF receptor. *Dev. Cell* **20**, 60-71.
- Vaccari, T. and Bilder, D. (2005). The *Drosophila* tumor suppressor Vps25 prevents nonautonomous overproliferation by regulating Notch trafficking. *Dev. Cell* **9**, 687-698.
- Vaccari, T., Lu, H., Kanwar, R., Fortini, M. E. and Bilder, D. (2008). Endosomal entry regulates Notch receptor activation in *Drosophila melanogaster*. *J. Cell Biol.* **180**, 755-762.
- Vaccari, T., Rusten, T. E., Menut, L., Nezis, I. P., Brech, A., Stenmark, H. and Bilder, D. (2009). Comparative analysis of ESCRT-I, ESCRT-II and ESCRT-III function in *Drosophila* by efficient isolation of ESCRT mutants. *J. Cell Sci.* **122**, 2413-2423.
- Vaccari, T., Duchi, S., Cortese, K., Tacchetti, C. and Bilder, D. (2010). The vacuolar ATPase is required for physiological as well as pathological activation of the Notch receptor. *Development* **137**, 1825-1832.
- Vermeer, P. D., Einwalter, L. A., Moninger, T. O., Rokhlina, T., Kern, J. A., Zabner, J. and Welsh, M. J. (2003). Segregation of receptor and ligand regulates activation of epithelial growth factor receptor. *Nature* **422**, 322-326.
- Vieira, A. V., Lamaze, C. and Schmid, S. L. (1996). Control of EGF receptor signaling by clathrin-mediated endocytosis. *Science* **274**, 2086-2089.
- Webster, B. M., Colombi, P., Jäger, J. and Lusk, C. P. (2014). Surveillance of nuclear pore complex assembly by ESCRT-III/Vps4. *Cell* **159**, 388-401.
- Wandler, S. L. and Bilder, D. (2010). Endocytic internalization routes required for Delta/Notch signaling. *Curr. Biol.* **20**, 538-543.
- Wollert, T. and Hurley, J. H. (2010). Molecular mechanism of multivesicular body biogenesis by ESCRT complexes. *Nature* **464**, 864-869.
- Wucherpennig, T., Wilsch-Brauninger, M. and Gonzalez-Gaitan, M. (2003). Role of *Drosophila* Rab5 during endosomal trafficking at the synapse and evoked neurotransmitter release. *J. Cell Biol.* **161**, 609-624.
- Xu, D., Li, Y., Arcaro, M., Lackey, M. and Bergmann, A. (2005). The CARD-carrying caspase Dronc is essential for most, but not all, developmental cell death in *Drosophila*. *Development* **132**, 2125-2134.
- Yan, Y., Denef, N. and Schüpbach, T. (2009). The vacuolar proton pump, V-ATPase, is required for Notch signaling and endosomal trafficking in *Drosophila*. *Dev. Cell* **17**, 387-402.
- Yang, L. and Baker, N. E. (2003). Cell cycle withdrawal, progression, and cell survival regulation by EGFR and its effectors in the differentiating *Drosophila* eye. *Dev. Cell* **4**, 359-369.
- Yang, C.-H., Axelrod, J. D. and Simon, M. A. (2002). Regulation of Frizzled by fat-like cadherins during planar polarity signaling in the *Drosophila* compound eye. *Cell* **108**, 675-688.
- Yoshimori, T., Yamagata, F., Yamamoto, A., Mizushima, N., Kabeya, Y., Nara, A., Miwako, I., Ohashi, M., Ohsumi, M. and Ohsumi, Y. (2000). The mouse SKD1, a homologue of yeast Vps4p, is required for normal endosomal trafficking and morphology in mammalian cells. *Mol. Biol. Cell* **11**, 747-763.
- Zecca, M. and Struhl, G. (2002). Subdivision of the *Drosophila* wing imaginal disc by EGFR-mediated signaling. *Development* **129**, 1357-1368.
- Zhai, R. G., Hiesinger, P. R., Koh, T.-W., Verstreken, P., Schulze, K. L., Cao, Y., Jafar-Nejad, H., Norga, K. K., Pan, H., Bayat, V. et al. (2003). Mapping *Drosophila* mutations with molecularly defined P element insertions. *Proc. Natl. Acad. Sci. USA* **100**, 10860-10865.
- Zheng, Z.-Y., Cheng, C.-M., Fu, X.-R., Chen, L.-Y., Xu, L., Terrillon, S., Wong, S. T., Bar-Sagi, D., Songyang, Z. and Chang, E. C. (2012). CHMP6 and VPS4A mediate the recycling of Ras to the plasma membrane to promote growth factor signaling. *Oncogene* **31**, 4630-4638.
